# Supplementary material for: Assembly of P3HT/CdSe nanowire networks in an insulating polymer host
Source: Royal Society of Chemistry journal article supplement (doi:10.1039/c8sm01001c), 2018-01-01
Supplement: c8sm01001c1.pdf [file c8sm01001c1.pdf]

## Supplementary information

### Assembly of P3HT/CdSe nanowire networks in an insulating polymer host

Kyuyoung Heo, Caroline Miesch, Jun-Hee Na, Todd Emrick, and Ryan C. Hayward\*

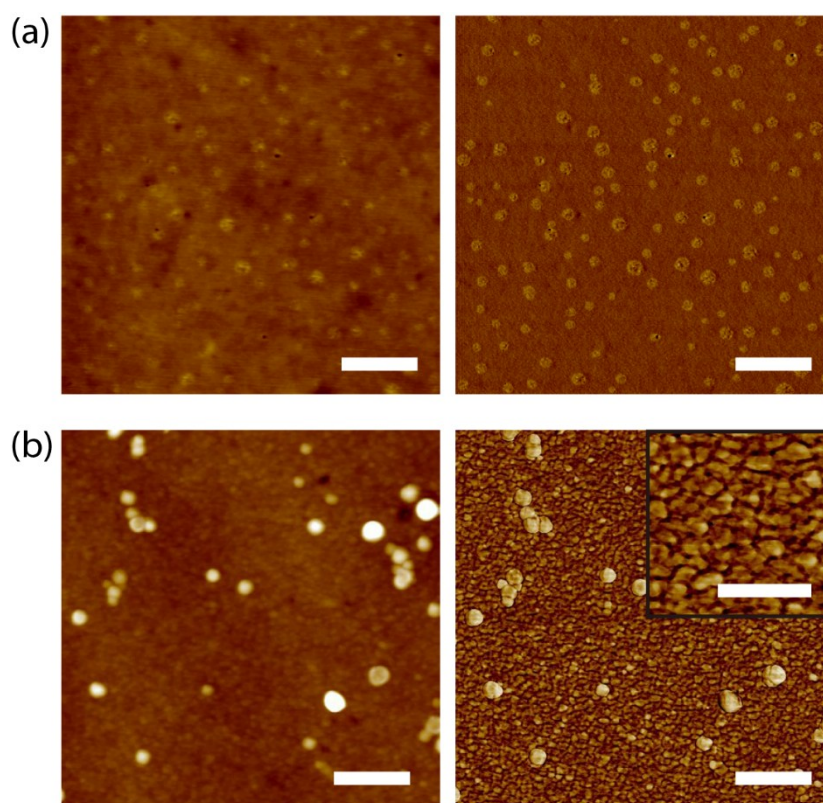

**Fig. S1** AFM height (left) and phase (right) images of (a) extracted-P3HT/PS (50/50) blend structures in a 92 nm-thick film, and (b) after selective removal of the top PS layer by immersing in cyclohexane for 10 min, which reduced the film thickness to 35 nm. Scale bars are 1 μm.

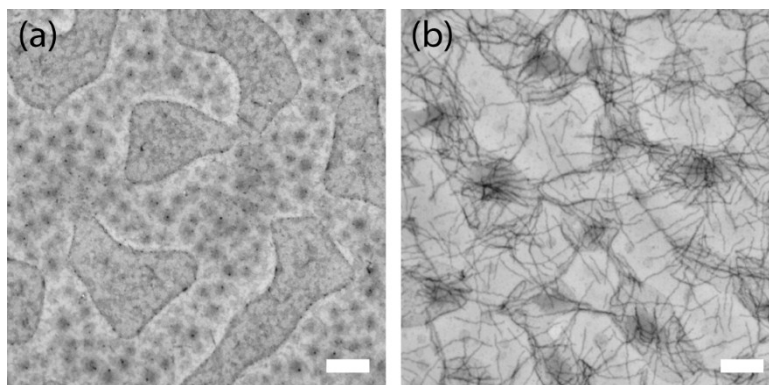

**Fig. S2** TEM images of extracted-P3HT/PS (50/50) blends with 10 wt% of CdSe QDs: (a) 0 d aging, (b) 7 d aging. Scale bars are 1  $\mu\text{m}$ .

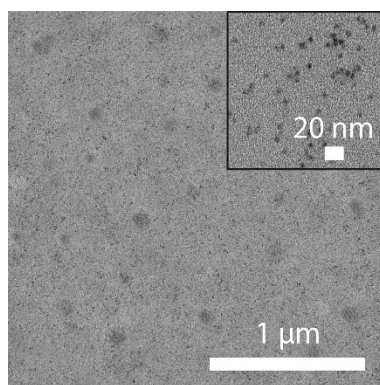

**Fig. S3** TEM image of extracted-P3HT/PS (50/50) blend with 15 wt% of CdSe-PS QDs.

**Table S1.** Ratio of the out-of-plane intensity  $I_{\text{op}}$  ( $q_z$  axis) to the in-plane intensity  $I_{\text{ip}}$  ( $q_{xy}$  axis) for the  $\pi$ - $\pi$  stacking peaks from GIWAXS.

| QD loading (wt %) | Aging (d) | $I_{\text{op}}/I_{\text{ip}}$ |
|-------------------|-----------|-------------------------------|
| 0                 | 0         | 1.44                          |
|                   | 7         | 0.61                          |
| 5                 | 0         | 1.17                          |
|                   | 7         | 0.98                          |
| 15                | 0         | 1.08                          |
|                   | 7         | 0.82                          |

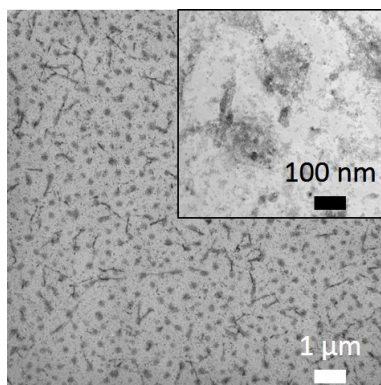

**Fig. S4** TEM image of unextracted-P3HT with 15wt% of CdSe QDs following 7 d of aging.

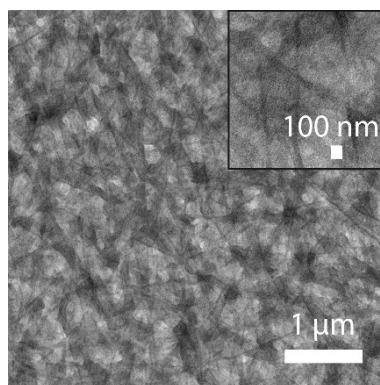

**Fig. S5** TEM image of preformed P3HT nanowires by addition of 1,4-dioxane to a solution of extracted P3HT in chloroform (1:5 by volume).
